# Supplementary material
Source: Springer Nature journal article supplement (https://www.springermedizin.de/resource/supplementary/12937_2010_302_MOESM1_ESM.pdf/25654822)

**OHADH (nmol/mg protein)**

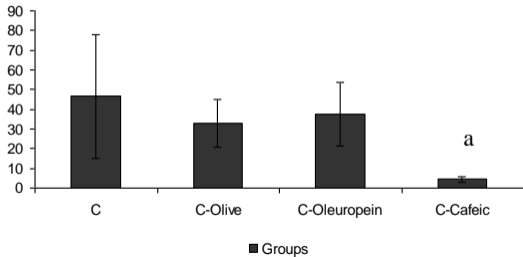

**OHADH (nmol/mg protein)**

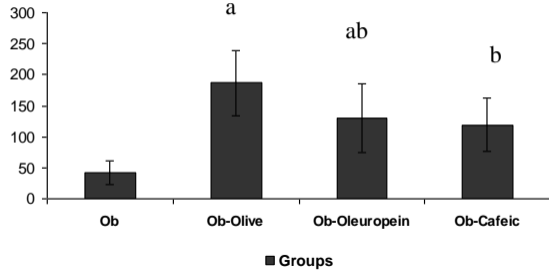

Supplement: MOESM1 [file 25654822]
